# Supplementary material
Source: PubMed Central journal article supplement (PMC8221772)

**A** Relationship between PVS Ratio difference and BMI difference in monozygotic twins

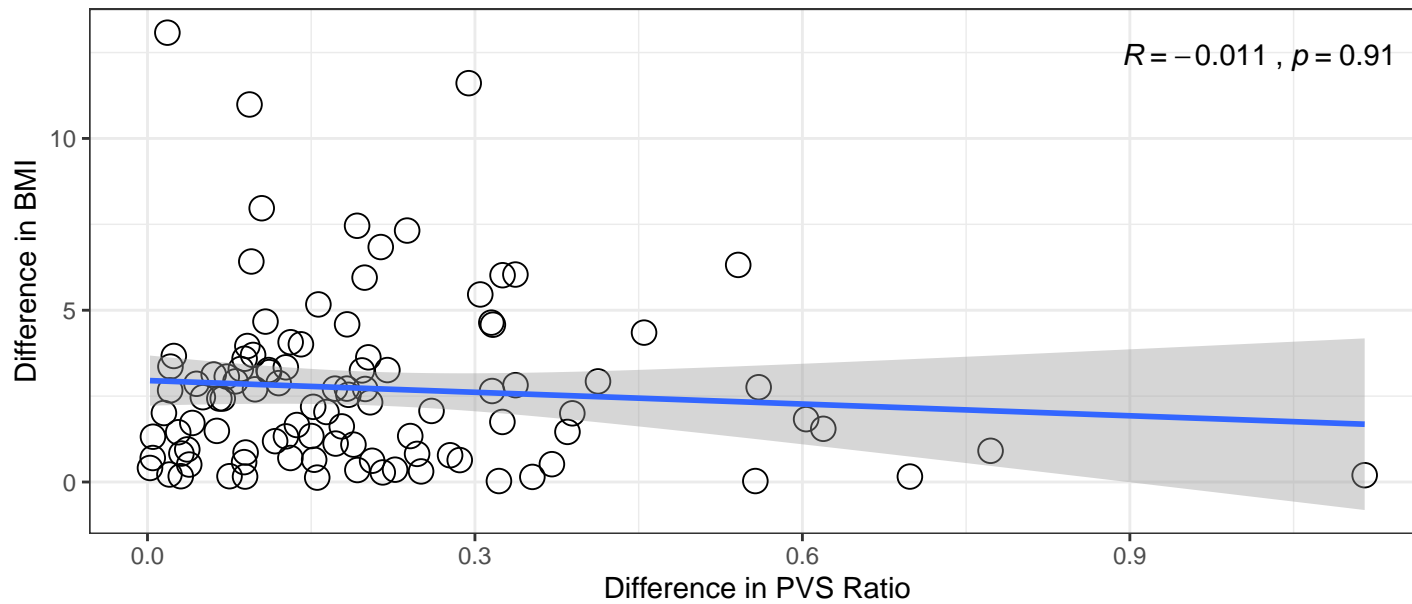

**B** Relationship between PVS Ratio difference and BMI difference in dizygotic twins

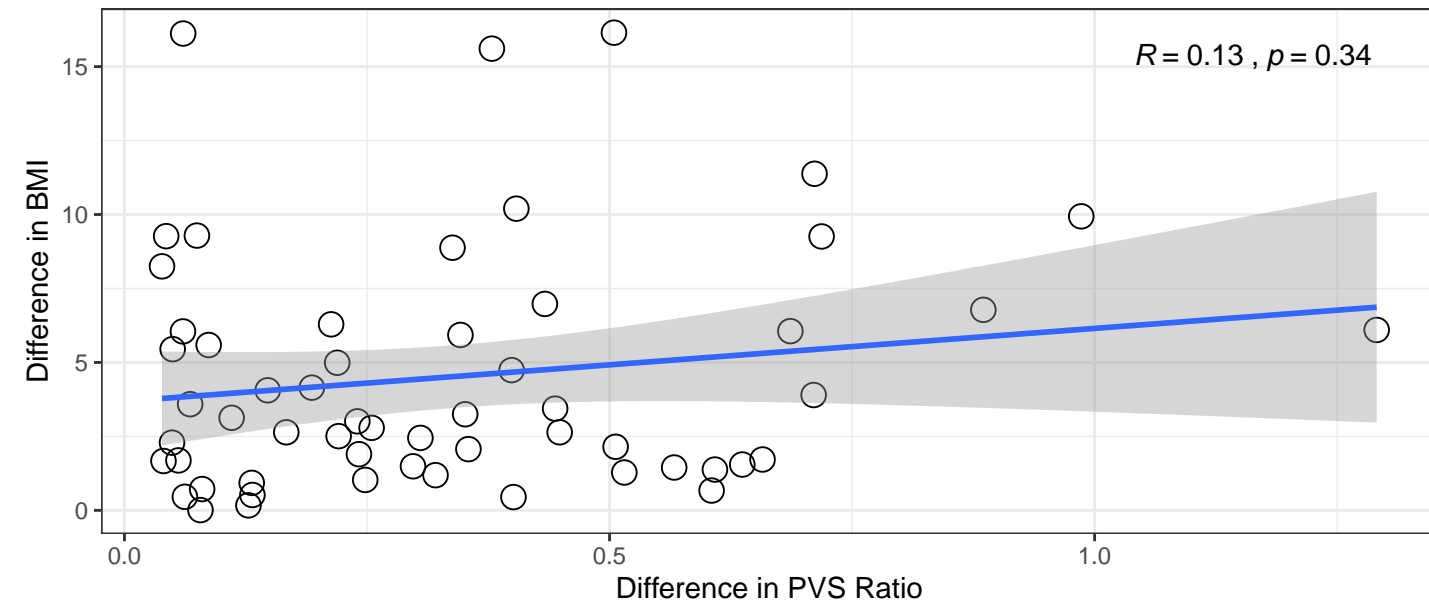

**C** Relationship between PVS Ratio difference and BMI difference in non-twin siblings

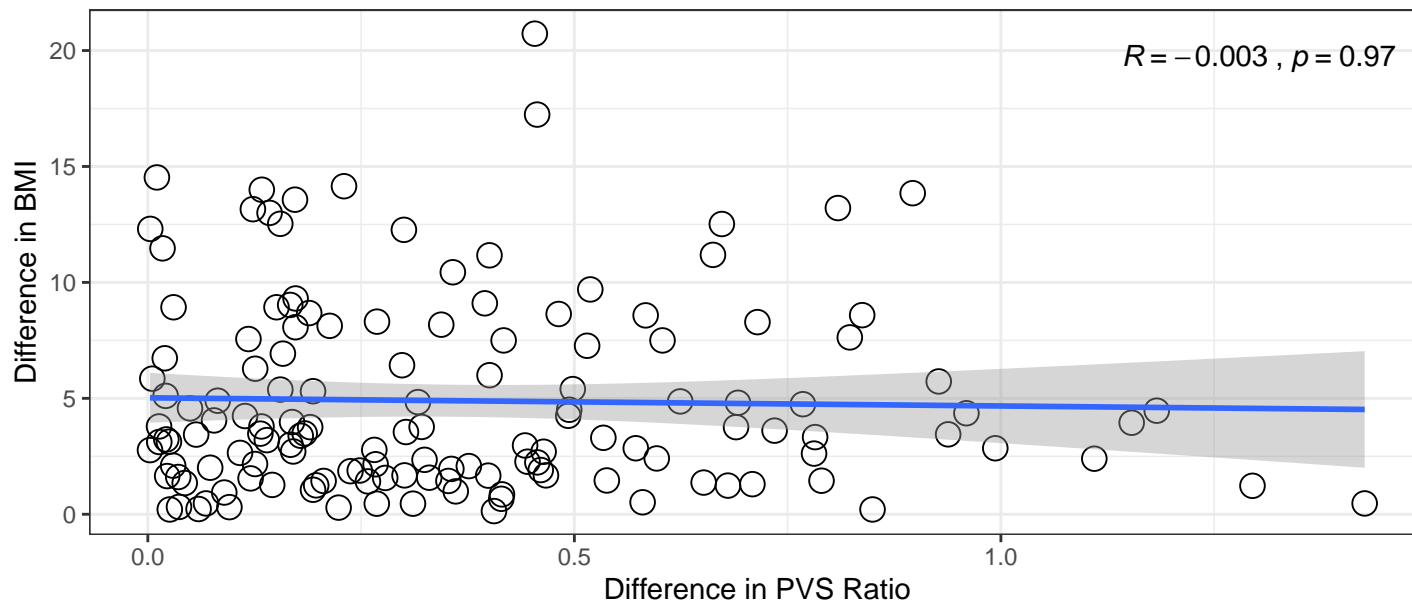

Supplement: sj-pdf-2-jcb-10.1177_0271678X20972856.pdf [file sj-pdf-2-jcb-10.1177_0271678X20972856.pdf]
