# Supplementary material
Source: PubMed Central journal article supplement (PMC8221772)

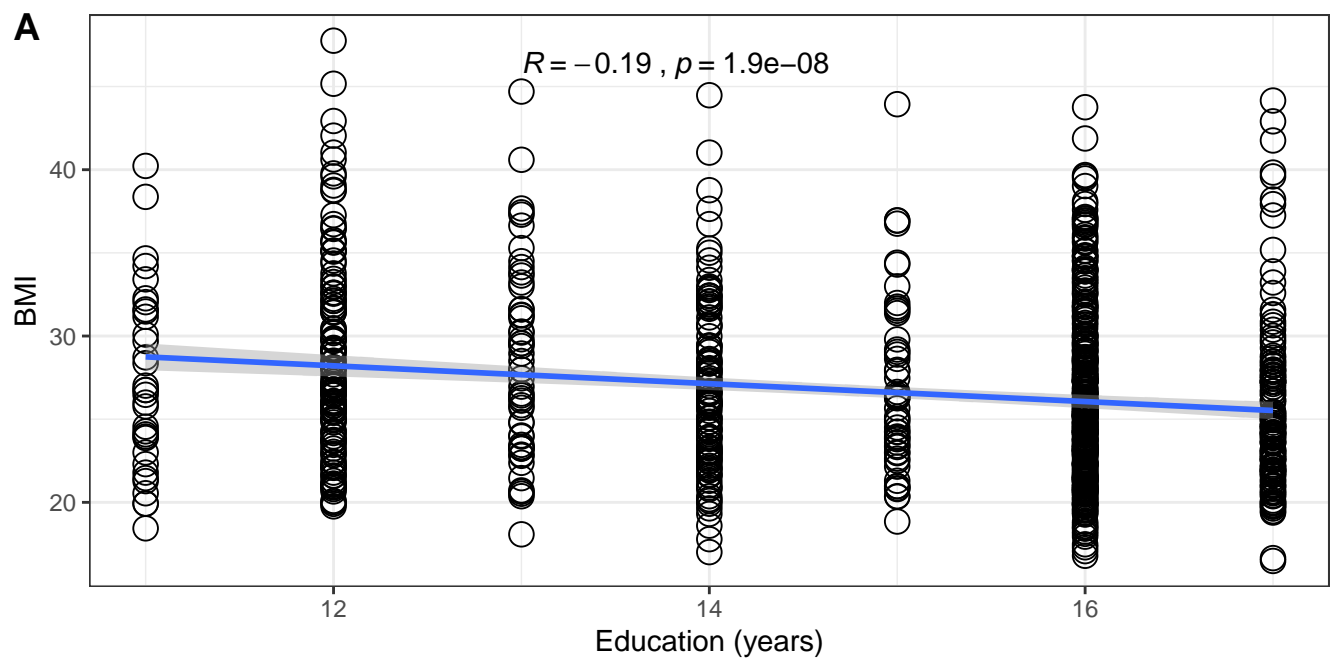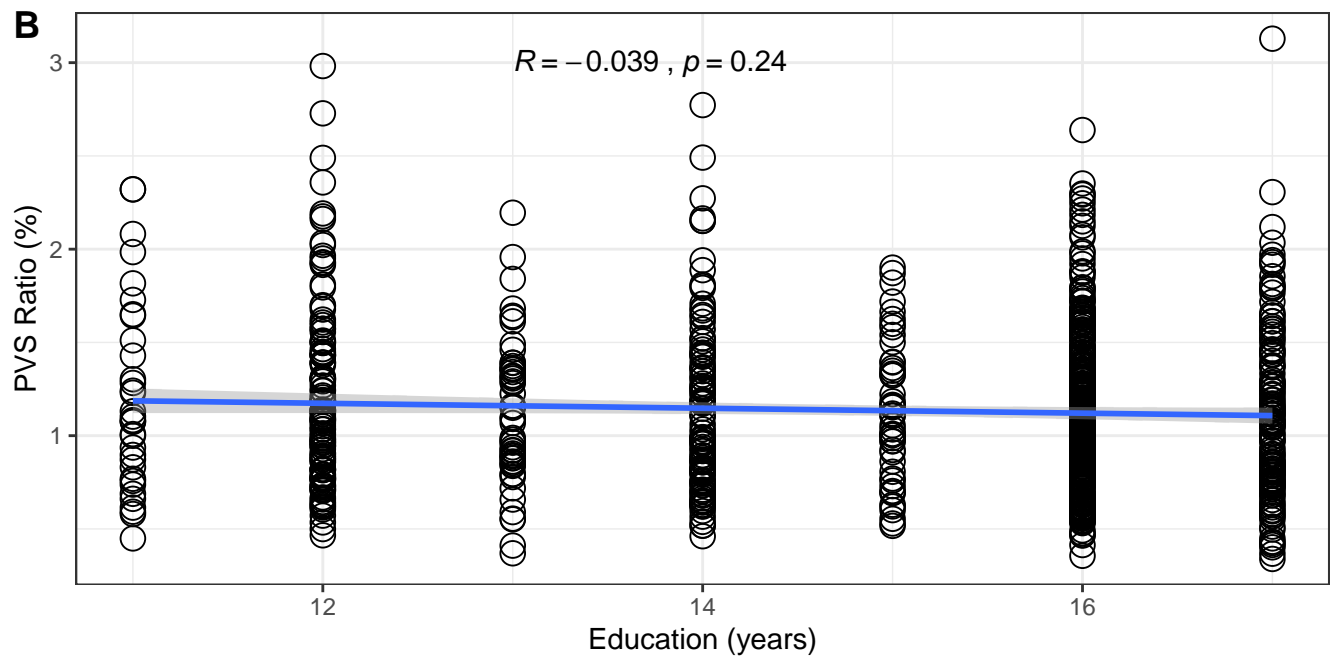

Supplement: sj-pdf-3-jcb-10.1177_0271678X20972856.pdf [file sj-pdf-3-jcb-10.1177_0271678X20972856.pdf]
